26 **Current affiliation:** Jennifer S. Curry, Center for Translation Research and  
27 Implementation Science, National Heart, Lung, and Blood Institute, Bethesda, MD, USA

28 **Running title:** Migration patterns effects on TB cases

29 **Keywords:** Tuberculosis, diabetes, Mexico-US border, migration, infectious diseases.

- 30 - Word count: 2,479
- 31 - Summary word count: 198
- 32 - Tables: 3
- 33 - Figures:1
- 34 - Supplementary materials
  - 35 ○ Tables: 1
  - 36 ○ Figures: 1
- 37 - References: 38

38  
39  
40  
41  
42  
43  
44  
45  
46  
47  
48  
49  
50  
51  
52  
53  
54  
55

56 **Abstract**

57 **Background.** Immigration is a determinant of tuberculosis (TB) epidemiology. The US-  
58 Mexican border state of Tamaulipas serves as a migration waypoint for further  
59 immigration to the US, and has the second highest incidence of TB in Mexico. Here, we  
60 determined the contribution and characteristics of immigrants to the TB burden in  
61 Tamaulipas.

62 **Methods.** TB surveillance data from Tamaulipas (2006-2013) was used to conduct a  
63 cross-sectional characterization of TB immigrants (born outside Tamaulipas) and  
64 identify their association with TB treatment outcomes.

65 **Results.** Immigrants comprised 30.8% of the TB patients, with >99% originating from  
66 internal Mexican migration. Most migration was from South to North, with cities adjacent  
67 to the US border as destinations. Immigrants had higher odds of risk factors for TB  
68 [older age ( $\geq 65$  yr old, OR 2.4, 95% CI 2.1, 2.8), low education (OR 1.3, 95% CI 1.2,  
69 1.4), diabetes (OR 1.2, 95% CI 1.1, 1.4)], or abandoning TB treatment (adjusted OR  
70 1.2, 95% CI 1.0, 1.5).

71 **Conclusions.** The US port of entry of Tamaulipas has a predominant south to north  
72 migration, positively impacting TB prevalence in this region. There is a need to identify  
73 strategies to prevent and manage TB more effectively in this Mexican migration  
74 waypoint.

75

76 **INTRODUCTION**

77 Foreign-born individuals bear a high proportion of the overall tuberculosis (TB) burden  
78 in high-income countries<sup>1</sup>. In the US, immigrants account for 71.4% of all TB cases and  
79 85% of the multidrug-resistant (MDR) TB cases, with Mexican nationals comprising  
80 nearly 20% in both cases<sup>2,3</sup>. The incidence of TB and MDR-TB in the US has  
81 significantly declined in the last decade, but this is not the case for the US states  
82 bordering Mexico<sup>4-6</sup>. And in the border state of Texas, the US counties bordering  
83 Mexico, Mexican nationals comprise more than 60% of the TB patients.<sup>7</sup>

84  
85 The Mexican region bordering the US houses a high number of vulnerable populations  
86 including, drug users, illegal immigrants, and most recently, COVID-19 patients<sup>8-12</sup>. The  
87 border has historically attracted immigrants from TB endemic areas like Southern  
88 Mexico and Central America<sup>6,13</sup>. In recent years, immigrants have progressively  
89 accumulated in overcrowded confinements that favor *Mycobacterium tuberculosis*  
90 transmission. Not surprisingly, the six Mexican Border States (Baja California, Sonora,  
91 Chihuahua, Coahuila, Nuevo León, and Tamaulipas) account for 34.3% of all TB cases  
92 in Mexico, with TB incidence rates of up to 44.9/100,000 in 2016, compared to  
93 13.8/100,000 nationally<sup>14-17</sup>.

94  
95 Mexico is considered the most important migration corridor in the world, serving as a  
96 country of origin, a place of transit, and a destination for many immigrants expecting to  
97 enter the US<sup>18,19</sup>. Within Mexico, Tamaulipas is a highly dynamic state. Annually, more  
98 than 50,000 individuals emigrate from Tamaulipas to settle in other Mexican states, e.g.  
99 Nuevo León, Veracruz, San Luis Potosí and Coahuila, and approximately another  
100 30,000 emigrate to the US<sup>20,21</sup>. Nonetheless, this population loss is quickly made up by  
101 a similar influx of approximately 100,000 immigrants coming into Tamaulipas each year  
102 in search of better job opportunities and improved or safer lifestyles, mostly from other  
103 Mexican states, where the economy is depressed such as Veracruz, San Luis Potosí  
104 and Chiapas<sup>20</sup>.

105

106 Among the Mexican-US border states, Tamaulipas has the second highest burden of  
107 TB, and because of its geographical location, it serves as a migration waypoint.  
108 Elucidation of the migration patterns of TB patients in Tamaulipas would provide a  
109 deeper understanding of their contribution to TB incidence in this border state, and  
110 percolation to the US, but such studies are missing. The primary objective of this study  
111 was to determine the contribution of immigrants to increased TB cases in Tamaulipas,  
112 and identify their place of origin, migration destinations, sociodemographic  
113 characteristics and their likelihood of TB treatment success, when compared to local  
114 residents.

115

## 116 **MATERIAL AND METHODS**

### 117 *Ethical committee*

118 This study was approved by the institutional review board of the University of Texas  
119 Health Science Center at Houston (Human Subject IRB # HSC-SPH-15-0489) and the  
120 Research Committee for the Secretaría de Salud de Tamaulipas (Human Subjects IRB#  
121 076/2015/CEI). This study followed the Strengthening the Reporting of Observational  
122 Studies in Epidemiology (STROBE) reporting guidelines.

123

### 124 *Data source and study population*

125 We used data collected for TB surveillance purposes between 2006 and 2013 by the  
126 Mexican Health Department (Secretaría de Salud de Mexico) for the state of  
127 Tamaulipas. These data included all the new TB cases among patients 18 years and  
128 older. Definitions were based on the official Mexican National TB program. Namely, TB  
129 diagnosis was based on the detection of acid-fast bacilli by smear microscopy or  
130 histopathology, culture or clinical findings. Further details on the procedure for selection  
131 of 8,431 adults (18 years or older) with newly diagnosed TB patients were reported  
132 elsewhere <sup>22</sup>.

133

### 134 *Measures and definitions*

135 The primary exposure of interest was immigrant status of the TB patient, defined as  
136 “YES” for individuals reporting a place of birth outside of Tamaulipas. The dataset

137 options included each Mexican state or “other countries”. Adverse treatment outcomes  
138 included failed TB treatment (when the patient remains smear positive after five months  
139 of anti-TB drug treatment), relapse (when presenting new TB within one year of  
140 treatment completion), abandon (when lost to follow-up for more than three months), or  
141 death (during the course of TB treatment). Treatment was evaluated by merging  
142 individual outcomes and categorizing them as successful or not per World Health  
143 Organization (WHO) definitions.<sup>23</sup> Drug-resistant (DR) TB refers to resistance to any  
144 first-line antibiotic for TB, and MDR-TB indicates resistance to both isoniazid and  
145 rifampicin. Patient’s characteristics, previously described in detail<sup>22</sup>, included age, sex,  
146 occupation, undernutrition (determined clinically), diabetes (self-reported or blood  
147 confirmed), and alcoholism (self-reported). Tamaulipas is divided into different sanitary  
148 jurisdictions, with those adjacent to the US referred to as “border” and others as “non-  
149 border” (**Table S1**).

150

### 151 *Statistical analysis*

152 We used proportions or means to describe the distribution of variables. We first  
153 evaluated three aspects of migration among TB patients in Tamaulipas: The proportion  
154 of immigrant TB patients, their place of origin, and their predominant migration routes.  
155 The Chi-square test for trend was used to detect TB incidence rate changes over the  
156 eight-year period of study. The percent change over time was estimated using both the  
157 linear interpolation method and average annual percent change to account for year-to-  
158 year change. Associations between immigrant status and their sociodemographics,  
159 comorbidities and TB treatment outcomes were also evaluated. Univariable logistic  
160 regression models were employed to estimate odds ratios (OR) and 95% confidence  
161 intervals assessing the differences in outcome across levels of co-variables. All  
162 multivariable logistic regression analysis included age and sex, and additional analysis  
163 was conducted with education status and comorbidities, in order to identify the  
164 independent contribution of place of birth to TB treatment success adjusted for potential  
165 confounders. All statistical tests were performed using STATA 14 (StataCorp.  
166 2015. Stata Statistical Software: Release 14. College Station, TX: StataCorp LP) at a  
167 5% level of significance.

168

## 169 **RESULTS**

### 170 *Participants characteristics*

171 The characteristics of the study population were described previously.<sup>22</sup> Essentially, the  
172 mean age of the 8,431 TB patients was 43 years and 65.5% were males. Nearly half  
173 were unemployed and 58% had at most a primary school education. More than 90%  
174 had pulmonary TB and 15.2% had an adverse TB treatment outcome. One fourth had  
175 diabetes and 5.3% had HIV.

176 We found that the average proportion of immigrants with TB was 30.8% over the eight  
177 years studied (range 18.6% - 37.8%; **Table S1**). There were minor changes in the  
178 proportion of immigrants with TB over time, with the lowest in 2006 (18.6%) and 2007  
179 (26.4%), and higher values and high between 2008 and 2013 [(range 30.8 – 37.8%);  
180 trend *p* value 0.526]. The TB incidence background was maintained similar over the  
181 eight-year study period (range 30.0 – 33.8/100,000 per year; trend *p* value 0.900; **Table**  
182 **S1**).

183

### 184 *Immigration patterns*

185 Nearly all TB immigrants were born in other Mexican states (2,577/2,596, 99.3%) with  
186 less than 1% originating from other countries. Nearly three-quarters (1,906 of 2,596,  
187 73.4%) were residing in border jurisdictions at the time of their TB diagnosis, with most  
188 in the cities of Reynosa (29.3%), Nuevo Laredo (22.3%) and Matamoros (16.8%;  
189 **Figure 1**). Most immigrant were born in four Mexican states: Chiapas (n=181, 2.2%),  
190 Nuevo Leon (n=255, 3.0%), San Luis Potosi (n=476, 5.7%), and Veracruz (n=903,  
191 10.7%). The most frequent destinations for immigrants originating from these four cities  
192 were as follows: TB patients originating from Chiapas were now mostly living in Nuevo  
193 Laredo (107/181, 59.1%), Reynosa (34/181, 18.8%), and Matamoros (23/181, 12.7%).  
194 Those from Nuevo Leon were now mostly in Reynosa (85/255, 33.3%) and Nuevo  
195 Laredo (83/255, 32.5%). Those from San Luis Potosi had mainly emigrated to  
196 Matamoros (124/476, 26.1%), Tampico (113/476, 23.7%), Nuevo Laredo (83/476,  
197 17.4%), and Reynosa (70/476, 14.7%). And the TB patients born in Veracruz were

198 mainly residing in Reynosa (367/903, 40.6%), Tampico (208/903, 23%), Matamoros  
199 (129/903, 14.3%), and Nuevo Laredo (83/903, 9.2%) (**Figure 1**).

200  
201 *Characteristics of TB patients associated with immigrant status by place of birth*

202 Compared to local residents, immigrant TB patients born outside of Tamaulipas were  
203 older [(OR 1.5, 95% CI 1.2, 1.6 for 41-64 yr old vs. OR 2.4, 95% CI 2.1, 2.8 for those  
204 older than 64 years], had a lower level of education (OR 1.3, 95% CI 1.2, 1.4, up to  
205 primary school vs. higher education), decreased odds of BCG vaccination (OR 0.9, 95%  
206 CI 0.8, 0.98), and/or decreased odds of having a positive smear for acid-fast bacilli at  
207 the time of TB diagnosis (OR 0.8, 95% CI 0.7, 0.9; **Table 1**). When evaluating  
208 comorbidities, immigrants with TB vs. those born in Tamaulipas had increased odds of  
209 diabetes (OR 1.2, 95% CI 1.1, 1.4), and lower HIV/AIDS (OR 0.7, 95% CI 0.6, 0.9).  
210 When adjusting for sociodemographics, a lower odds of a positive AFB smear or higher  
211 odds of abandoning treatment remained significant (**Table 1**).

212  
213 Analysis was also conducted based on the most frequent states of birth: Chiapas,  
214 Nuevo Leon, San Luis Potosi or Veracruz (**Table 2**). We found that the odds of  
215 HIV/AIDS was lower in immigrants from Chiapas (OR 0.2, 95% CI 0.04, 0.7) or San Luis  
216 Potosi (OR 0.5, 95% CI 0.3, 0.9). Type 2 diabetes was more prevalent in those born in  
217 San Luis Potosi (OR 1.6, 95% CI 1.3, 1.9) and Veracruz (OR 1.2, 95% CI 1.1, 1.4).  
218 Regarding TB clinical characteristics, there were no differences between local and  
219 immigrant TB patients in the prevalence of the pulmonary location, drug resistant TB or  
220 smear results, except for lower smear positivity for immigrants with TB from Veracruz.  
221 Regarding TB treatment outcomes, when compared to TB patients born in Tamaulipas  
222 (locals), immigrant born in Nuevo Leon had a 2-fold increased odds of TB treatment  
223 failure, and those born in Chiapas had 2.1-fold increased odds of TB relapse. When  
224 controlling for age, sex, education level, BCG vaccination, diabetes and HIV/AIDS,  
225 being an immigrant from Nuevo Leon remained associated with abandonment of  
226 treatment (OR 1.9, 95% CI 1.2, 2.9; **Table 1**).

227  
228 **DISCUSSION**



229 We conducted a study aimed at understanding the epidemiology of TB among  
230 immigrants in Tamaulipas, a Mexican state bordering the US. We found that immigrants  
231 represented one-third of the TB patients, with >99% originating from other Mexican  
232 states. TB immigrants were older than local residents. This was unexpected and it is  
233 possible that they arrived when they were younger and now have a reactivation TB or a  
234 recent infection- we cannot distinguish both possibilities. Consistent with their older age,  
235 immigrants with TB had lower levels of education, higher prevalence of diabetes and  
236 lower BCG vaccination. TB immigrants worldwide are less likely to have treatment  
237 success, due in part to their higher likelihood of treatment interruption<sup>24</sup>. After  
238 adjustment, abandonment of treatment was higher.

239  
240 Mexico has a total population of approximately 126 million, with close to 50% living in  
241 poverty<sup>25,26</sup>. Economic insecurity and drug and human trafficking cartels are main  
242 propagators of Mexican internal migration movements, with about 20% living in states in  
243 which they were not born<sup>26-29</sup>. It is alluded that migration from the poorest regions in  
244 Mexico may be responsible for a significant proportion of TB cases in the Mexican  
245 states located across the US border, but this has never been systemically evaluated. A  
246 study conducted 25 years ago among immigrant TB patients identified at local health  
247 departments at the four US border states, provides some insights<sup>30</sup>. Of the 164  
248 Hispanic immigrant TB patients, 154 were born in Mexico and ten in Central America.  
249 Among the 154 born in Mexico, 93 (60%) had been living in a border Mexican town  
250 before emigrating to the US, and of these 93, 51 (55%) had first moved to a Mexican  
251 border town for at least 2 years before emigrating to the US. The findings from this  
252 study illustrates the influx of immigrants from non-border Mexican regions, into the  
253 border, and then into the USA, suggesting the importance of TB control in border and  
254 non-border regions of Mexico for control of TB in communities along the Texas-Mexico  
255 border<sup>30</sup>.

256  
257 A limitation of our study is that the analysis covered a period dating seven to fourteen  
258 years back. We do not have data on the proportion of immigrant TB patients in more  
259 recent years, but we would anticipate an increase. This is based on the regional trend

260 for the increase in caravans of immigrants departing from South and Central American  
261 countries where TB is also endemic, with hopes of reaching the US, but with many  
262 remaining stuck in northern Mexico<sup>31,32</sup>. Tamaulipas is a “Remain in Mexico” (RIM) state  
263 under the Immigrant Protection Protocols (MPP) implemented in 2019 with top  
264 immigrant nationalities from Honduras, Guatemala, Cuba, El Salvador, and Ecuador.  
265 These policies highlight the epidemiological landscape of the Mexican border  
266 communities. Thus, we expect that in current times the contribution of immigrants to TB  
267 control would be at least the same or higher than our observations.

268  
269 Another study limitation is that we conducted a secondary analysis of data collected for  
270 TB surveillance. Therefore, we were not able to calculate the TB incidence among those  
271 born in Tamaulipas versus immigrants born elsewhere. Year of immigration was not  
272 available either, so we could distinguish between migrants who were temporarily  
273 located in Tamaulipas vs immigrants who had permanently settled in this state.  
274 Furthermore, in our analysis we could not adjust for the years of residence prior to TB  
275 diagnosis. We did not have information on the reasons motivating migration, pre-  
276 departure health status, or travel conditions that can increase TB risk<sup>33</sup>. We cannot rule  
277 out reporting bias due to the stigma associated with migration. An association between  
278 immigrant status and drug-resistant TB was not measured. Another limitation was lack  
279 of access to the identification and treatment of latent TB infection, a key action in the  
280 pillar 1 of the current WHO End TB Strategy<sup>34,35</sup>.

281  
282 In contemporary times an additional challenge to TB control is the coronavirus disease  
283 2019 (COVID-19) pandemic. In Mexican border states, poverty, overcrowding, stress  
284 from immigration and lack of access to healthcare have contributed to high COVID-19  
285 case-fatality rates in border Mexican states (16% compared to 8.5% nationally in  
286 2020).<sup>36</sup> Not surprisingly, COVID-19 has had a notable impact on TB services in the US-  
287 Mexico border. This, together with immigration patterns from South to North, is likely to  
288 result in higher drug susceptible and drug resistant TB cases in the upcoming years,  
289 with potential spill over to US border states.

290

291 In summary, we find that approximately one-third of the TB patients in Tamaulipas are  
292 immigrants from within Mexico, mostly originating from southern states and moving to  
293 communities along the US border. Given the recent increase in migration within Mexico  
294 due to drug-related cartels, or from Latin American countries <sup>37</sup>, further studies are  
295 necessary to understand in more depth the underlying reasons, the detailed migration  
296 pathways, the prevalence of drug-resistance and the TB treatment outcomes in this  
297 mobile population. Understanding these issues will be essential to design strategies for  
298 improved TB control in gateway states like Tamaulipas. Such studies will also serve as  
299 a model to address the challenge of migration on TB control in other regions of the US-  
300 Mexico border, in the adjacent US where immigrants comprise a significant proportion  
301 of the TB patients, or in other countries worldwide where millions migrate each year  
302 from TB-endemic regions.<sup>38</sup>

303

304

305 **Conflict of Interest**

306 All authors declare no conflict of interest.

307

308 **Acknowledgments**

309 We thank all the Tamaulipas state health jurisdictions who contributed to the collection  
310 and recording of TB data, Dr. Santa Elizabeth Ceballos Liceaga from the Sistema de  
311 Vigilancia Epidemiológica de Tuberculosis y Lepra, Dirección General de  
312 Epidemiología, Secretaría de Salud de México, for providing the surveillance datasets  
313 for our analysis.

314

315 **Funding**

316 This research did not receive funding support from an agency, commercial or not-for-  
317 profit sectors. BIR has current funding support from NIH, NIA P01-AG051428 (PI Dr.  
318 Joanne Turner) and NIAID 1R21AI144541

319

320 **Authors contributions**

321 **Jennifer S. Curry:** Conceptualization, Data analysis, interpretation, original draft of  
322 manuscript; **Bassent Abdelbary:** Data analysis, interpretation, edition of manuscript;  
323 **Moncerrato García-Viveros:** Conceptualization and coordination of data collection;  
324 **Juan I. García:** Data analysis interpretation and edition of manuscript; **Marcel**  
325 **Yotebieng:** Data analysis interpretation and edition of manuscript; **Adrian Rendon:**  
326 Data analysis interpretation and edition of manuscript; **Jordi B. Torrelles:** Data analysis  
327 interpretation and edition of manuscript; **Blanca I. Restrepo:** Conceptualization, Project  
328 administration, Resources, data interpretation, edition of manuscript. **All authors:**  
329 Reviewed and approved the final version of this manuscript.

330

331 **References**

332 1 Pareek M, Greenaway C, Noori T, et al. The impact of migration on tuberculosis  
333 epidemiology and control in high-income countries: a review. BMC Med 2016;  
334 14:48

- 335 2 Centers for Disease Control and Prevention, (CDC). Table 9. Tuberculosis Cases  
336 and Percentages, by Multidrug Resistance (MDR), Origin of Birth, and Previous  
337 History of TB: United States, 1993–2019. *Reported Tuberculosis in the United*  
338 *States 2019 2020*; <https://www.cdc.gov/tb/statistics/reports/2019/table9.htm>.  
339 Accessed 2021-01, 2021.
- 340 3 Tsang C A, Langer A J, Navin T R, et al. Tuberculosis Among Foreign-Born  
341 Persons Diagnosed  $\geq 10$  Years After Arrival in the United States, 2010-2015.  
342 *MMWR Morb Mortal Wkly Rep* 2017; 66:295-298
- 343 4 Bojorquez-Chapela I, Barnes R F W, Flood J, et al. Multidrug-resistant  
344 tuberculosis among patients in Baja California, Mexico, and hispanic patients in  
345 California. *American Journal of Public Health* 2013; 103:1301--1305
- 346 5 Centers for Disease Control and Prevention, (CDC). Table 28. Tuberculosis  
347 Cases and Case Rates per 100,000 Population: Reporting Areas, 2019 and  
348 2018. *Reported Tuberculosis in the United States 2019 2020*;  
349 <https://www.cdc.gov/tb/statistics/reports/2019/table28.htm>. Accessed 2021-01,  
350 2021.
- 351 6 Fitchett J R a. Tuberculosis transmission across the United States-mexico  
352 border. *Revista Panamericana de Salud Publica/Pan American Journal of Public*  
353 *Health* 2011; 29:57--60
- 354 7 Restrepo B I, Camerlin A J, Rahbar M H, et al. Cross-sectional assessment  
355 reveals high diabetes prevalence among newly-diagnosed tuberculosis cases.  
356 *Bull WHO* 2011; 89:352-359
- 357 8 Consejo Nacional de Ciencia y Tecnologia, (CONACYT). COVID-19 México.  
358 [web]. 2021; Official COVID-19 statistics for Mexico in real time. Available at:  
359 <https://datos.covid-19.conacyt.mx/>. Accessed 2021-01-31, 2021.
- 360 9 Deiss R, Garfein R S, Lozada R, et al. Influences of cross-border mobility on  
361 tuberculosis diagnoses and treatment interruption among injection drug users in  
362 Tijuana, Mexico. *Am J Public Health* 2009; 99:1491-1495
- 363 10 Kenyon T A, Driver C, Haas E, et al. Immigration and tuberculosis among  
364 children on the United States-Mexico border, County of San Diego, California.  
365 *Pediatrics* 1999; 104:e8

- 366 11 Moya E M, Chavez-Baray S M, Wood W W, et al. Nuestra Casa: An advocacy  
367 initiative to reduce inequalities and tuberculosis along the US-Mexico border. Int  
368 Public Health J 2016; 8:107-119
- 369 12 CONACYT. COVID-19 México. [web]. 2021; Official COVID-19 statistics for  
370 Mexico in real time. Available at: <https://datos.covid-19.conacyt.mx/>. Accessed  
371 2021-01-31, 2021.
- 372 13 Oren E, Fiero M H, Barrett E, et al. Detection of latent tuberculosis infection  
373 among migrant farmworkers along the US-Mexico border. BMC Infect Dis 2016;  
374 16:630
- 375 14 Bojorquez-Chapela I, Bcker C E, Orejel I, et al. Drug resistance in Mexico:  
376 Results from the National Survey on Drug-Resistant Tuberculosis. International  
377 Journal of Tuberculosis and Lung Disease 2013; 17:514--519
- 378 15 Centro Nacional de Programas Preventivos y Control de Enfermedades,  
379 (CENAPRECE). Cifras oficiales tuberculosis. 2016;  
380 [http://www.cenaprece.salud.gob.mx/programas/interior/micobacteriosis/tuberculo](http://www.cenaprece.salud.gob.mx/programas/interior/micobacteriosis/tuberculosis/cifras_oficiales.html#)  
381 [sis/cifras\\_oficiales.html#](http://www.cenaprece.salud.gob.mx/programas/interior/micobacteriosis/tuberculosis/cifras_oficiales.html#).
- 382 16 Hernández-Garduño E, Mendoza-Damián F, Garduño-Alanís A, et al.  
383 Tuberculosis in Mexico and the USA, Comparison of Trends Over Time 1990-  
384 2010. Tuberc Respir Dis 2015; 78:246-252
- 385 17 Valencia C I, Ernst K, Rosales C B. Tuberculosis Treatment Completion in a  
386 United States/Mexico Binational Context. Frontiers in Public Health 2017; 5
- 387 18 International Organization for Migration, and United Nations. *World Migration*  
388 *Report 2013*. Geneva: International Organization for Migration;2013.
- 389 19 Integration and Building Inclusive Societies. *United Nations Alliance of*  
390 *Civilizations*2010.
- 391 20 Secretaría de Salud, Gobierno del Estado de Tamaulipas. Unidades y  
392 Jurisdicciones en el Estado de Tamaulipas. 2015, 2021.
- 393 21 Jurisdicciones Sanitarias. *Tamaulipas Secretaría de Salud*2015.
- 394 22 Abdelbary B E, Garcia-Viveros M, Ramirez-Oropesa H, et al. Tuberculosis-  
395 diabetes epidemiology in the border and non-border regions of Tamaulipas,  
396 Mexico. Tuberculosis (Edinb) 2016; 101S:S124-S134

- 397 23 World-Health-Organization. *Definitions and reporting framework for tuberculosis-*  
398 *2013 revision (updated Dec 2014 and Jan 2020).*  
399 [https://apps.who.int/iris/bitstream/handle/10665/79199/9789241505345\\_eng.pdf;jsessionid=FCB8DE8324C970443BBAE93749D776B1?sequence=1](https://apps.who.int/iris/bitstream/handle/10665/79199/9789241505345_eng.pdf;jsessionid=FCB8DE8324C970443BBAE93749D776B1?sequence=1): World-  
400 Health-Organization; 2014 2014.  
401
- 402 24 Vo L N Q, Codlin A J, Forse R J, et al. Tuberculosis among economic migrants: a  
403 cross-sectional study of the risk of poor treatment outcomes and impact of a  
404 treatment adherence intervention among temporary residents in an urban district  
405 in Ho Chi Minh City, Viet Nam. *BMC Infect Dis* 2020; 20:134
- 406 25 Consejo Nacional de Evaluación de la Política de Desarrollo Social, (CONEVAL).  
407 *Medición de la Pobreza 2008 - 2018.* CONEVAL 2014;  
408 <http://www.coneval.gob.mx/Medicion/MP/Paginas/Pobreza-2014-en.aspx>.
- 409 26 Instituto Nacional de Estadística y Geografía, (INEGI). *Censo de Población y*  
410 *Vivienda 2020.* Instituto Nacional de Estadística y Geografía 2020 2020.
- 411 27 Martinez J N. Beyond Networks: Health, Crime, and Migration in Mexico.  
412 *International Journal of Population Research* 2014; 2014:971739
- 413 28 Hernandez D. Internal migration flows below the radar in Mexico. *Los Angeles*  
414 *Times* 2011.
- 415 29 Mexican Migration Patterns Signal a New Immigration Reality. *American*  
416 *Immigration Council* 2011.
- 417 30 Moser K, Ocana M, Mohle-Boetani J, et al. Characteristics of Foreign-Born  
418 Hispanic Patients with Tuberculosis - Eight U.S. Counties Bordering Mexico,  
419 1995. *Morbidity and Mortality Weekly Report* 1996; 45:1032-1036
- 420 31 Latin America Working Group, (LAGW). All About the “Remain in Mexico” Policy.  
421 2021; <https://www.lawg.org/all-about-the-remain-in-mexico-policy/>.
- 422 32 Medecins Sans Frontiers, (MSF). US migration policy endangers lives of asylum  
423 seekers in Tamaulipas state. 2020; <https://www.msf.org/us-migration-policy-endangers-lives-asylum-seekers-tamaulipas-state-mexico>.
- 424
- 425 33 Dhavan P, Dias H M, Creswell J, et al. An overview of tuberculosis and  
426 migration. *Int J Tuberc Lung Dis* 2017; 21:610-623

- 427 34 World Health Organization, (WHO). *The End TB Strategy*. Geneva: World Health  
428 Organization;2015.
- 429 35 Uplekar M, Raviglione M. WHO's End TB Strategy: From stopping to ending the  
430 global TB epidemic. Vol 622015:196--199.
- 431 36 Google. Google News: COVID-2019. 2021; Worldwide statistics for COVID-19  
432 cases and deaths in real time. Available at:  
433 [https://news.google.com/covid19/map?hl=en-](https://news.google.com/covid19/map?hl=en-US&gl=US&ceid=US%3Aen&mid=%2Fm%2F0b90_r)  
434 [US&gl=US&ceid=US%3Aen&mid=%2Fm%2F0b90\\_r](https://news.google.com/covid19/map?hl=en-US&gl=US&ceid=US%3Aen&mid=%2Fm%2F0b90_r). Accessed 2021-02, 2021.
- 435 37 Basu S, Pearlman S. Violence and migration: evidence from Mexico's drug war.  
436 IZA Journal of Development and Migration 2017; 7:18
- 437 38 Rendon A, Centis R, Zellweger J P, et al. Migration, TB control and elimination:  
438 Whom to screen and treat. Pulmonology 2018; 24:99-105

439  
440  
441  
442  
443  
444  
445  
446  
447  
448  
449  
450  
451  
452  
453  
454  
455  
456  
457



**Table 1: Demographic and clinical characteristics of TB patients by place of birth in Tamaulipas, 2006-2013<sup>1</sup>**

| Characteristics                            | Born in Tamaulipas (n = 5,835) | Not born in Tamaulipas (n = 2,596) | OR (95% CI) <sup>2</sup> | Adj-OR (95% CI) <sup>3</sup> |
|--------------------------------------------|--------------------------------|------------------------------------|--------------------------|------------------------------|
| <b>Sociodemographics and comorbidities</b> |                                |                                    |                          |                              |
| <b>Age</b>                                 |                                |                                    |                          |                              |
| 18 - 40 years old                          | 3,038 (52.1%)                  | 1,023 (39.4%)                      | 1.0                      |                              |
| 41 - 64 years old                          | 2,219 (38%)                    | 1,108 (42.7%)                      | <b>1.5 (1.3, 1.6)</b>    |                              |
| ≥ 65 years old                             | 578 (9.9%)                     | 465 (17.9%)                        | <b>2.4 (2.1, 2.8)</b>    |                              |
| <b>Male sex</b>                            | 3,849 (66%)                    | 1,674 (64.5%)                      | 0.9 (0.8, 1.03)          |                              |
| <b>Education</b>                           |                                |                                    |                          |                              |
| No or primary education                    | 3,103 (55.9%)                  | 1,574 (62.1%)                      | <b>1.3 (1.2, 1.4)</b>    |                              |
| Higher education                           | 2,447 (44.1%)                  | 960 (37.9%)                        | 1.0                      |                              |
| <b>Occupation</b>                          |                                |                                    |                          |                              |
| Employed                                   | 1,848 (42.9%)                  | 781 (41.2%)                        | 1.0                      | 1.0                          |
| Not employed                               | 1,788 (41.5%)                  | 843 (44.5%)                        | 1.1 (0.9, 1.3)           | 0.9 (0.8, 1.0)               |
| Unemployed                                 | 669 (15.5%)                    | 271 (14.3%)                        | 0.9 (0.8, 1.1)           | 0.9 (0.7, 1.0)               |
| <b>BCG (Yes)</b>                           | 4,211 (77%)                    | 1,783 (74.6%)                      | <b>0.9 (0.8, 0.98)</b>   | 1.1 (0.9, 1.2)               |
| <b>Comorbidities</b>                       |                                |                                    |                          |                              |
| Diabetes                                   | 1,397 (23.9%)                  | 724 (27.9%)                        | <b>1.2 (1.1, 1.4)</b>    | 01.0 (0.9, 1.1)              |
| HIV/AIDS                                   | 332 (5.7%)                     | 113 (4.3%)                         | <b>0.7 (0.6, 0.9)</b>    | 0.9 (0.7, 1.1)               |
| Excess Alcohol use                         | 344 (5.9%)                     | 130 (5%)                           | 0.8 (0.7, 1.1)           | 0.8 (0.7, 1.0)               |
| Undernutrition                             | 474 (8.1%)                     | 226 (8.7%)                         | 1.1 (0.9, 1.3)           | 1.1 (0.9, 1.3)               |
| <b>Clinical presentation of TB</b>         |                                |                                    |                          |                              |
| <b>Location of disease</b>                 |                                |                                    |                          |                              |
| Extra-pulmonary                            | 470 (8.1%)                     | 206 (7.9%)                         | 1.0                      | 1.0                          |
| Pulmonary                                  | 5,364 (91.9%)                  | 2,390 (92.1%)                      | 1.0 (0.8, 1.2)           | 0.9 (0.8, 1.2)               |
| <b>AFB smear</b>                           | 4,629 (85.8%)                  | 1,982 (83.5%)                      | <b>0.8 (0.7, 0.9)</b>    | <b>0.8 (0.7, 0.9)</b>        |
| <b>Any drug resistance</b>                 | 179 (3.1%)                     | 80 (3.1%)                          | 1.0 (0.8, 1.3)           | 1.0 (0.8, 1.4)               |
| <b>Multi-drug resistance</b>               | 40 (0.7%)                      | 15 (0.6%)                          | 0.8 (0.5, 1.5)           | 0.9 (0.5, 1.7)               |
| <b>Treatment outcomes</b>                  |                                |                                    |                          |                              |
| Cured                                      | 4,874 (85.1%)                  | 2,135 (83.9%)                      | 1.0                      | 1.0                          |
| Treatment failure                          | 107 (1.9%)                     | 51 (2%)                            | 1.1 (0.8, 1.5)           | 1.1 (0.7, 1.5)               |
| Death                                      | 354 (6.2%)                     | 167 (6.6%)                         | 1.1 (0.9, 1.3)           | 0.9 (0.7, 1.1)               |
| Abandon treatment                          | 390 (6.8%)                     | 191 (7.5%)                         | 1.1 (0.9, 1.3)           | <b>1.2 (1.0, 1.5)</b>        |
| TB relapse                                 | 126 (2.2%)                     | 48 (1.9%)                          | 0.8 (0.6, 1.2)           | 0.8 (0.6, 1.2)               |

<sup>1</sup> Data expressed as n (column %), with % based on the total number of cases with available information;

<sup>2</sup> Tamaulipas is the reference category; <sup>3</sup> Adjusted for age, sex, and education level; Bold p-values are significant;

458

459

460

**Table 2. Association between the most common places of birth of migrants, and sociodemographics, comorbidities, TB presentation and treatment outcomes<sup>1,2</sup>**

| Place of birth                             | Chiapas<br>(n = 181)   | Nuevo Leon<br>(n = 255) | San Luis Potosi<br>(n = 476) | Veracruz<br>(n = 903) |
|--------------------------------------------|------------------------|-------------------------|------------------------------|-----------------------|
| <b>Sociodemographics and comorbidities</b> |                        |                         |                              |                       |
| <b>Age</b>                                 |                        |                         |                              |                       |
| 18 - 40 years old                          | 1.0                    | 1.0                     | 1.0                          | 1.0                   |
| 41 - 64 years old                          | <b>1.5 (1.1, 2.2)</b>  | <b>2.1 (1.6, 2.8)</b>   | <b>2.3 (1.8, 2.8)</b>        | 1 (0.9, 1.2)          |
| ≥ 65 years old                             | <b>3.5 (2.3, 5.2)</b>  | <b>3.6 (2.5, 5.1)</b>   | <b>4.4 (3.4, 5.7)</b>        | 0.9 (0.8, 1.3)        |
| <b>Male sex</b>                            | 1.2 (0.9, 1.6)         | 0.9 (0.7, 1.1)          | 0.9 (0.7, 1.1)               | 0.9 (0.8, 1.0)        |
| <b>Education</b>                           |                        |                         |                              |                       |
| Higher education                           | 1.0                    | 1.0                     | 1.0                          | 1.0                   |
| Up to 1o education                         | <b>1.8 (1.3, 2.5)</b>  | <b>1.6 (1.2, 2.0)</b>   | <b>1.9 (1.5, 2.3)</b>        | 0.9 (0.8, 1.1)        |
| <b>Occupation</b>                          |                        |                         |                              |                       |
| Employed                                   | 1.0                    | 1.0                     | 1.0                          | 1.0                   |
| Not employed                               | 1.4 (0.9, 2.0)         | 1.3 (0.9, 1.8)          | 1.2 (0.9, 1.6)               | 0.9 (0.8, 1.1)        |
| Unemployed                                 | 1.2 (0.7, 2.0)         | 1.2 (0.7, 1.8)          | 1.2 (0.8, 1.6)               | 0.9 (0.7, 1.1)        |
| <b>BCG (Yes)</b>                           | 0.8 (0.6, 1.2)         | 1 (0.8, 1.4)            | 1.1 (0.8, 1.3)               | 0.9 (0.8, 1.1)        |
| <b>Comorbidities</b>                       |                        |                         |                              |                       |
| Diabetes                                   | 0.9 (0.6, 1.3)         | 1.2 (0.9, 1.6)          | <b>1.6 (1.3, 1.9)</b>        | <b>1.2 (1.1, 1.4)</b> |
| HIV                                        | <b>0.2 (0.04, 0.7)</b> | 0.5 (0.3, 1.1)          | <b>0.5 (0.3, 0.9)</b>        | 1.3 (0.9, 1.7)        |
| Excess Alcohol use                         | 0.7 (0.4, 1.5)         | 0.8 (0.5, 1.5)          | 0.9 (0.6, 1.4)               | 0.8 (0.6, 1.1)        |
| Malnutrition                               | 1.3 (0.8, 2.1)         | 0.8 (0.5, 1.3)          | 1 (0.7, 1.4)                 | 1.1 (0.9, 1.4)        |
| <b>Clinical presentation of TB</b>         |                        |                         |                              |                       |
| <b>Location of disease</b>                 |                        |                         |                              |                       |
| Extra-pulmonary                            | 1.0                    | 1.0                     | 1.0                          | 1.0                   |
| Pulmonary                                  | 1.5 (0.8, 2.9)         | 1.2 (0.7, 1.9)          | 1.1 (0.8, 1.6)               | 0.9 (0.7, 1.2)        |
| <b>Diagnostic AFB smear</b>                | 1.2 (0.7, 1.9)         | 0.9 (0.6, 1.3)          | 0.8 (0.6, 1.1)               | <b>0.7 (0.6, 0.8)</b> |
| <b>Any drug resistance</b>                 | 0.7 (0.3, 1.9)         | 1.2 (0.6, 2.3)          | 0.6 (0.3, 1.2)               | 0.8 (0.5, 1.2)        |
| <b>Multi-drug resistance</b>               | 1.6 (0.4, 6.7)         | 1.1 (0.3, 4.8)          | 0.9 (0.3, 2.9)               | 0.3 (0.1, 1.3)        |
| <b>Treatment outcomes</b>                  |                        |                         |                              |                       |
| Cured                                      | 1.0                    | 1.0                     | 1.0                          | 1.0                   |
| Treatment failure                          | 0.9 (0.3, 2.9)         | <b>2.0 (1.1, 4.1)</b>   | 1.3 (0.7, 2.5)               | 0.8 (0.4, 1.4)        |
| Death                                      | 1.2 (0.7, 2.1)         | 1.0 (0.6, 1.8)          | 1.1 (0.8, 1.6)               | 0.9 (0.7, 1.3)        |
| Abandon treatment                          | 1.1 (0.6, 1.9)         | 1.5 (0.9, 2.3)          | 0.6 (0.4, 1.0)               | 1.2 (0.9, 1.6)        |
| TB relapse                                 | <b>2.1 (1.1, 4.3)</b>  | 1.3 (0.6, 2.8)          | 0.7 (0.3, 1.5)               | <b>0.5 (0.3, 0.9)</b> |

<sup>1</sup> Tamaulipas is the reference category; <sup>2</sup> Data expressed as crude odds ratio (95% CI)

461  
462  
463  
464

**Table 3. Association between the place of birth of migrants and the clinical presentation and outcomes of TB** <sup>1, 2</sup>

| Place of birth               | Chiapas<br>(n = 181) | Nuevo Leon<br>(n = 255) | San Luis Potosi<br>(n = 476) | Veracruz<br>(n = 903) |
|------------------------------|----------------------|-------------------------|------------------------------|-----------------------|
| <b>Location of disease</b>   |                      |                         |                              |                       |
| Extra-pulmonary              | 1.0                  | 1.0                     | 1.0                          | 1.0                   |
| Pulmonary                    | 1.3 (0.7, 2.7)       | 1.1 (0.6, 1.8)          | 0.9 (0.7, 1.4)               | 0.9 (0.7, 1.3)        |
| <b>Diagnostic AFB smear</b>  | 1.1 (0.7, 1.8)       | 0.8 (0.6, 1.2)          | <b>0.7 (0.5, 0.9)</b>        | <b>0.7 (0.6, 0.9)</b> |
| <b>Any drug resistance</b>   | 0.6 (0.2, 2.0)       | 1.1 (0.6, 2.3)          | 0.7 (0.3, 1.4)               | 0.8 (0.5, 1.2)        |
| <b>Multi-drug resistance</b> | 1.2 (0.2, 8.8)       | 0.93 (0.1, 5.1)         | 1.0 (0.3, 3.5)               | 0.3 (0.1, 1.6)        |
| <b>Treatment outcomes</b>    |                      |                         |                              |                       |
| Cured                        | 1.0                  | 1.0                     | 1.0                          | 1.0                   |
| Treatment failure            | 1.1 (0.3, 3.4)       | 2.0 (0.9, 4.1)          | 1.2 (0.6, 2.4)               | 0.9 (0.5, 1.7)        |
| Death                        | 1.2 (0.6, 2.2)       | 0.8 (0.4, 1.5)          | 0.9 (0.6, 1.3)               | 0.9 (0.7, 1.3)        |
| Abandon treatment            | 1.3 (0.7, 2.4)       | <b>1.9 (1.2, 2.9)</b>   | 0.7 (0.4, 1.2)               | 1.2 (0.9, 1.6)        |
| TB relapse                   | 1.4 (0.6, 3.5)       | 1.3 (0.6, 2.9)          | 0.6 (0.3, 1.4)               | <b>0.5 (0.3, 1.0)</b> |

<sup>1</sup> Tamaulipas is the reference category; <sup>2</sup> Data expressed as odds ratio (95% CI), adjusted for for age, sex, education, BCG vaccination, diabetes and HIV/AIDS; AFB, Acid-fast bacilli

466

467

468

469

470

471

472

473

474

475

476 **Figure Legend**

477 **Figure 1. Predominant south to north migration patterns of TB patients from**

478 **Tamaulipas.** The predominant migration patterns of TB patients diagnosed in

479 Tamaulipas is from South and North, and to a lesser extent, from North to North. The

480 south to north routes were from Chiapas (in the Southern border with Guatemala) to

481 Nuevo Laredo, or Veracruz to Reynosa or San Luis Potosi to Matamoros. The north to

482 north pattern was from Nuevo Leon to Reynosa. In all cases, the final destination cities,

483 namely Matamoros, Reynosa and Nuevo Laredo, were in northern Tamaulipas and

484 adjacent to the US border. The proportion of immigrants from each place of origin,

485 towards the indicated destination, is shown in the legend for each pathway. The names

486 of the other states along the US-Mexico border as shown as a reference in lighter font.

487

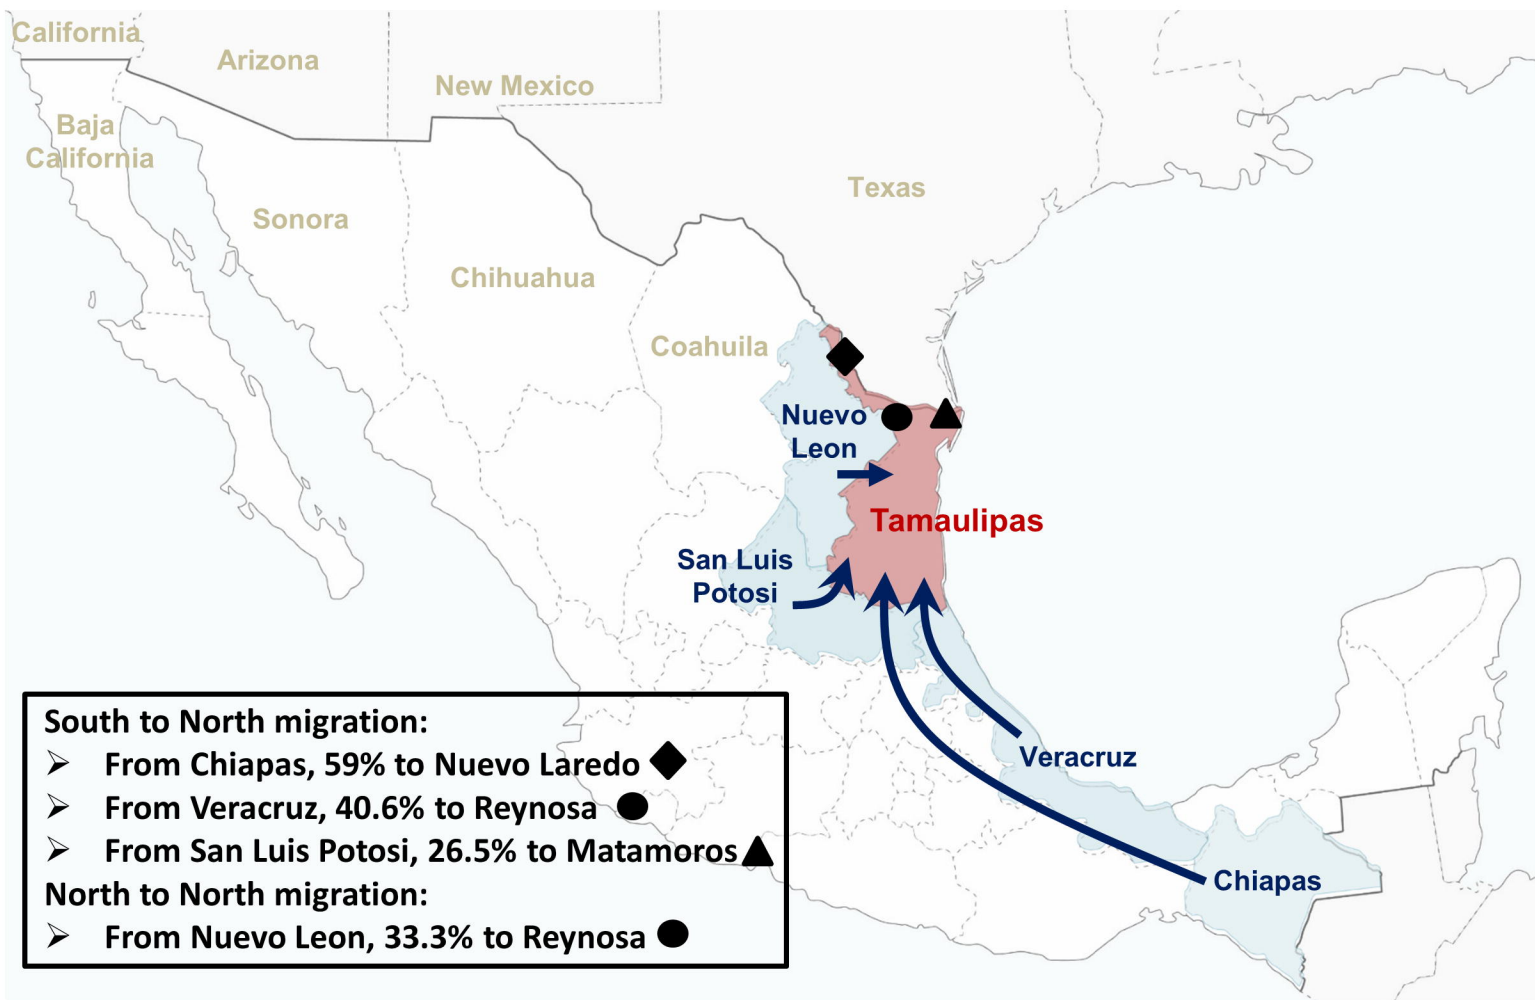

Source: https://medrxiv.org/content/10.1101/2021.03.31.21254658v1.full.pdf
